# Supplementary material
Source: ML conference proceedings conference paper supplement (https://www.ecva.net/papers/eccv_2022/papers_ECCV/html/136790072_ECCV_2022_paper.php)
Supplement: Supplementary file 1 [file 136790072-supp.zip]

# Supplemental File to “Restore Globally, Refine Locally: A Mask-Guided Scheme to Accelerate Super-Resolution Networks”

Xiaotao Hu<sup>1,2</sup>, Jun Xu<sup>2</sup> \*, Shuhang Gu<sup>3</sup>, Ming-Ming Cheng<sup>1</sup>, and Li Liu<sup>4</sup>

<sup>1</sup> College of Computer Science, Nankai University

<sup>2</sup> School of Statistics and Data Science, Nankai University

<sup>3</sup> The University of Sydney

<sup>4</sup> Inception Institute of Artificial Intelligence

## 1 Content

Here, we provide more details of our Mask-Guided Acceleration (MGA) scheme on accelerating five representative super-resolution (SR) networks. Specifically, we provide

- the choice of  $K$  for feature patch selection in §2;
- the importance of dynamic convolution in our Mask Prediction (MP) module in §3;
- detail comparison of our MGA scheme with ClassSR in §4;
- comparison of our MGA accelerated SR networks and swift-designed SR networks in similar FLOPs in §5;
- the implementation details of our MGA scheme in §6;
- more details of decomposing SR networks in §7;
- more quantitative comparisons on different variants of five existing SR networks in §8;
- more ablation studies in §9;
- more visual comparisons on different variants of five existing SR networks accelerated by our MGA scheme in §10.

## 2 The Choice of $K$ for Feature Patch Selection

We sort the values of all pixels in “MASK\_GT” (described in **Line334** of our main paper) and “MASK”, respectively, and calculate the intersection number between the top  $K$  pixels with maximum values in MASK\_GT and MASK. The results in Table 1 show that our MP module is more accurate when  $K = 1000$  than the other choices. So we choose  $K = 1000$  to trade-off performance and efficiency. For datasets with large image size (*e.g.*, Urban100, Manga109, Test2K, Test4K), we set  $K = 1000$ . For datasets with small image size (*e.g.*, Set5, Set14, B100), we set  $K = 240$ .

---

\* Jun Xu is the corresponding author (email: nankaimathxujun@gmail.com).

Table 1: **Accuracy of our MP module on the mask prediction with different  $K$  ( $p = 4$ ) on Urban100.**

| $K$          | 200  | 400  | 600  | 800  | 1000 | 1200 | 1400 |
|--------------|------|------|------|------|------|------|------|
| Number       | 129  | 302  | 496  | 719  | 960  | 969  | 987  |
| Accuracy (%) | 64.5 | 75.5 | 82.7 | 89.9 | 96.0 | 80.8 | 70.5 |

Table 2: **Comparison results of different SR networks on the Urban100, Test2K and Test4K datasets. “-M(conv)”**: common convolution. “-M(D-conv)”**:** dynamic convolution.

| Scale      | Method             | # Params | Urban100 |        |          | Test2K |        |          | Test4K |        |          |
|------------|--------------------|----------|----------|--------|----------|--------|--------|----------|--------|--------|----------|
|            |                    |          | PSNR     | SSIM   | FLOPs(G) | PSNR   | SSIM   | FLOPs(G) | PSNR   | SSIM   | FLOPs(G) |
| $\times 3$ | FSRCNN-M(conv)     | 42K      | 26.20    | 0.8019 | 13.44    | 28.59  | 0.8215 | 28.59    | 30.02  | 0.8598 | 103.78   |
|            | FSRCNN-M(D-conv)   | 43K      | 26.22    | 0.8025 | 13.45    | 28.59  | 0.8216 | 28.61    | 30.03  | 0.8598 | 103.85   |
|            | PAN-M(conv)        | 310K     | 27.92    | 0.8467 | 36.31    | 29.16  | 0.8395 | 74.87    | 30.78  | 0.8756 | 266.22   |
|            | PAN-M(D-conv)      | 311K     | 27.96    | 0.8475 | 36.34    | 29.17  | 0.8396 | 74.94    | 30.78  | 0.8757 | 266.49   |
|            | RFDN-M(conv)       | 720K     | 28.25    | 0.8540 | 45.12    | 29.22  | 0.8401 | 93.58    | 30.84  | 0.8760 | 334.03   |
|            | RFDN-M(D-conv)     | 721K     | 28.28    | 0.8545 | 45.16    | 29.23  | 0.8403 | 93.67    | 30.84  | 0.8761 | 334.38   |
|            | SRResNet-M(conv)   | 1.71M    | 27.95    | 0.8477 | 144.65   | 29.18  | 0.8391 | 309.15   | 30.75  | 0.8747 | 1125.26  |
|            | SRResNet-M(D-conv) | 1.71M    | 28.01    | 0.8485 | 144.70   | 29.18  | 0.8391 | 309.26   | 30.76  | 0.8747 | 1125.70  |
|            | RCAN-M(conv)       | 16.11M   | 29.07    | 0.8702 | 1110.15  | 29.54  | 0.8493 | 2362.16  | 31.23  | 0.8841 | 8574.10  |
|            | RCAN-M(D-conv)     | 16.11M   | 29.10    | 0.8706 | 1110.19  | 29.55  | 0.8493 | 2362.27  | 31.23  | 0.8841 | 8574.54  |
| $\times 4$ | FSRCNN-M(conv)     | 42K      | 24.47    | 0.7248 | 14.59    | 27.08  | 0.7521 | 29.18    | 28.30  | 0.8003 | 101.70   |
|            | FSRCNN-M(D-conv)   | 43K      | 24.50    | 0.7261 | 14.60    | 27.09  | 0.7523 | 29.19    | 28.31  | 0.8004 | 101.74   |
|            | PAN-M(conv)        | 327K     | 25.96    | 0.7806 | 29.72    | 27.55  | 0.7725 | 58.26    | 28.95  | 0.8194 | 200.22   |
|            | PAN-M(D-conv)      | 328K     | 26.02    | 0.7825 | 29.74    | 27.57  | 0.7728 | 58.30    | 28.96  | 0.8195 | 200.37   |
|            | RFDN-M(conv)       | 739K     | 26.14    | 0.7872 | 29.92    | 27.61  | 0.7739 | 27.70    | 29.02  | 0.8209 | 195.96   |
|            | RFDN-M(D-conv)     | 740K     | 26.17    | 0.7878 | 29.94    | 27.61  | 0.7741 | 57.75    | 29.03  | 0.8210 | 196.15   |
|            | SRResNet-M(conv)   | 2.01M    | 26.03    | 0.7839 | 124.01   | 27.57  | 0.7734 | 249.14   | 28.92  | 0.8197 | 871.64   |
|            | SRResNet-M(D-conv) | 2.01M    | 26.07    | 0.7850 | 124.04   | 27.57  | 0.7735 | 249.20   | 28.92  | 0.8197 | 871.89   |
|            | RCAN-M(conv)       | 16.04M   | 26.90    | 0.8106 | 728.49   | 27.86  | 0.7835 | 1457.45  | 29.31  | 0.8294 | 5084.20  |
|            | RCAN-M(D-conv)     | 16.04M   | 26.96    | 0.8119 | 728.52   | 27.86  | 0.7837 | 1457.51  | 29.31  | 0.8295 | 5084.44  |

### 3 The Importance of Dynamic Convolution in Our MP Module

The local patches of an image are spatially varying, as well as the relationship between the central pixel and its surrounding pixels. It is essential to employ dynamic conv to adaptively tackle the weight matrices for different local patches. The comparison results of our MP module with standard convolution or dynamic convolution on accelerating SR networks are listed in Table 2. One can see that the proposed MP module with dynamic convolution is indeed more helpful to our MGA scheme on accelerating the five popular SR networks, on the Urban100, Test2K, and Test4K datasets.

### 4 Detail Comparison of Our MGA Scheme with ClassSR

We denote our Mask-Guided variant as M-Net. From Tabel 1 of our main paper, Table 6, Table 3, and Table 7, we observe that All-Net (described in **Line328** of our main paper) achieves a better performance than D-Net (described in **Line322** of our main paper). The reason is that, processing patch-wise features further in the last layers of the accelerated SR network enables it to well re-construct the local details of LR image, and thus boosting the SR performance.

Table 3: **Results of different SR networks accelerated by ClassSR and our MGA scheme** on the Set5, Set14, B100 and Manga109 datasets. “-D”: D-Net. “-A”: ALL-Net. “-M”: network accelerated by our MGA scheme. “-C”: network accelerated by ClassSR.

| Scale | Method     | # Params | Set5      |          | Set14     |          | B100      |          | Manga109  |          |
|-------|------------|----------|-----------|----------|-----------|----------|-----------|----------|-----------|----------|
|       |            |          | PSNR(RGB) | FLOPs(G) | PSNR(RGB) | FLOPs(G) | PSNR(RGB) | FLOPs(G) | PSNR(RGB) | FLOPs(G) |
| ×4    | FSRCNN-D   | 42K      | 28.59     | 3.15     | 25.75     | 6.42     | 25.57     | 4.32     | 25.61     | 26.74    |
|       | FSRCNN-A   | 42K      | 28.69     | 3.17     | 25.83     | 6.47     | 25.61     | 4.35     | 25.74     | 26.94    |
|       | FSRCNN-C   | 113K     | 28.58     | 2.58     | 25.75     | 4.47     | 25.57     | 3.34     | 25.60     | 19.28    |
|       | FSRCNN-M   | 43K      | 28.69     | 2.47     | 25.83     | 4.13     | 25.60     | 3.06     | 25.74     | 17.21    |
|       | SRResNet-D | 1.67M    | 30.25     | 23.22    | 26.78     | 47.38    | 26.23     | 31.86    | 28.40     | 197.37   |
|       | SRResNet-A | 1.67M    | 30.26     | 26.45    | 26.79     | 53.96    | 26.24     | 36.29    | 28.40     | 224.80   |
|       | SRResNet-C | 3.06M    | 30.23     | 20.75    | 26.75     | 38.54    | 26.20     | 26.01    | 28.40     | 190.67   |
|       | SRResNet-M | 2.01M    | 30.25     | 20.85    | 26.79     | 35.14    | 26.24     | 25.96    | 28.40     | 146.38   |
|       | RCAN-D     | 15.70M   | 30.65     | 117.62   | 27.11     | 239.93   | 26.47     | 161.34   | 29.49     | 999.53   |
|       | RCAN-A     | 15.70M   | 30.66     | 157.97   | 27.12     | 322.26   | 26.48     | 216.70   | 29.59     | 1342.50  |
|       | RCAN-C     | 30.11M   | 30.64     | 110.42   | 27.09     | 205.02   | 26.44     | 147.56   | 29.50     | 938.28   |
|       | RCAN-M     | 16.04M   | 30.66     | 106.82   | 27.11     | 206.11   | 26.48     | 152.66   | 29.57     | 858.64   |

Table 4: **Comparison of compressed and swift-designed methods with similar or higher computational costs.** We test all the models on one NVIDIA Tesla V100 GPU.

| Scale | Method        | Urban100     |               |               | Test2K       |               |                | Test4K       |               |                |
|-------|---------------|--------------|---------------|---------------|--------------|---------------|----------------|--------------|---------------|----------------|
|       |               | PSNR (dB)    | SSIM          | FLOPs (G)     | PSNR (dB)    | SSIM          | FLOPs (G)      | PSNR (dB)    | SSIM          | FLOPs (G)      |
| ×4    | CARN-Mobile   | 25.63        | 0.7701        | <b>27.28</b>  | 27.44        | 0.7684        | 63.46          | 28.80        | 0.8156        | 243.47         |
|       | IMDN          | 26.03        | 0.7837        | 34.19         | 27.58        | 0.7734        | 79.55          | 28.98        | 0.8201        | 305.18         |
|       | <b>RFDN-M</b> | <b>26.17</b> | <b>0.7878</b> | 29.94         | <b>27.61</b> | <b>0.7741</b> | <b>57.75</b>   | <b>29.03</b> | <b>0.8210</b> | <b>196.15</b>  |
|       | D-DBPN        | 26.38        | 0.7946        | 4352.32       | 27.71        | 0.7790        | 10124.85       |              | OOM           |                |
|       | RDN           | 26.61        | 0.8028        | 1093.45       | 27.69        | 0.7781        | 2543.70        | 29.11        | 0.8243        | 9759.12        |
|       | <b>RCAN-M</b> | <b>26.96</b> | <b>0.8119</b> | <b>728.52</b> | <b>27.86</b> | <b>0.7837</b> | <b>1457.51</b> | <b>29.31</b> | <b>0.8295</b> | <b>5084.44</b> |

To this end, the Refine-Net (described in **Line221** of our main paper) of M-Net further processes the feature patches of the most under-SR areas selected by our MP module. Our MP module boosts the performance of M-Net to be close to the performance of All-Net. This is very different from CClassSR, since it achieves the performance close to that of D-Net. Therefore, the performance of our MGA scheme on accelerating SR networks can be potentially better than that of ClassSR.

## 5 Comparison of our MGA Accelerated SR Networks and Swift-Designed SR Networks with Similar FLOPs

The results in Table 4 show that the RFDN-M or RCAN-M accelerated by our MGA scheme outperforms the corresponding state-of-the-art SR networks in terms of PSNR and SSIM, while with similar or higher computational costs in terms of FLOPs.

## 6 An Implementation Detail of Our MGA Scheme

Here, we present more details about our proposed MGA scheme. We first get the coarse feature  $\mathbf{F}_c \in \mathbb{R}^{C \times H \times W}$  via the Base-Net. Then we feed the coarse feature  $\mathbf{F}_c$  into the Mask Prediction (MP) module. The MP module contains two  $3 \times 3$  convolutional layers. To obtain a D-Conv of kernel size  $5 \times 5$ , through a  $3 \times 3$  convolutional layer, our MGA scheme obtains from  $\mathbf{F}_c$  the weight of the D-conv, which is of size  $\mathbb{R}^{5 \times 5 \times H \times W}$ . The size of feature patches obtained by the Feature Patch Selection is  $p \times p$ . To make the cut edges smoother, we crop the feature patches of size  $p + pa$ , where  $pa = 1$  is an additional padding size. After one convolutional layer, this padding size can be compensated, and we obtain feature patches of size  $p \times p$ . In order to keep the parameters consistent, we do not change the overall network structure. The padding size of the first convolutional layer in the Refine-Net is set as  $pa = 0$ . The upsampling operation to produce the coarse SR image after the Base-Net is exactly the same as that in the original SR network. In our MGA scheme, a skip connection could be used within the Base-Net and Refine-Net, respectively, possibly with a little performance drop. We will define the compatible types of our MGA scheme in the revision.

## 7 More Details on Network Decomposition

Our MGA scheme has different decomposing ways for different SR networks. Specifically, 1) for FSRCNN [2], the Base-Net has 3 basic blocks while the Refine-Net has 1 basic block; 2) for PAN [12], the Base-Net has 12 basic blocks while the Refine-Net has 4 basic blocks; 3) for RFDN [6], the Base-Net has 4 basic blocks while the Refine-Net has 2 basic blocks; 4) for SRResNet [5], the Base-Net has 12 basic blocks while the Refine-Net has 4 basic blocks; 5) for RCAN [11], the Base-Net has 7 basic blocks while the Refine-Net has 3 basic blocks. We use four Nvidia 2080Ti GPUs for training. The duration for FSRCNN, RFDN, PAN, SRResNet and RCAN are about 48, 72, 56, 96 and 168 hours, respectively. We will explain these details in our revision.

## 8 More Quantitative Results

In Table 6, we summarize the quantitative results of five SR networks on the three datasets (i.e., Urban100 [4], Test2K [3], and Test4K [3]) on the  $\times 2$  SR task. In Table 7, we summarize the quantitative results of five SR networks on the rest four datasets (i.e., Set5 [1], Set14 [10], B100 [7], and Manga109 [8]) for the  $\times 2$ ,  $\times 3$ , and  $\times 4$  SR tasks.

## 9 More Ablation Study Results

**More details on our Ablation Study 1) in the main paper.** In Table 8, we summarize the quantitative results of two SR networks (FSRCNN [2] and



PAN [12]) on five datasets (i.e., B100 [7], Urban100 [4], Manga109 [8], Test2K [3], and Test4K [3]) for the  $\times 2$  and  $\times 4$  SR tasks. These results validate the necessity to design a two-channel spatial feature map  $\mathbf{F}_s$  in our MGA scheme.

**More details on our Ablation Study 2) in the main paper.** In Table 9, we summarize the quantitative results of FSRCNN [2] and PAN [12] on five datasets (i.e., B100 [7], Urban100 [4], Manga109 [8], Test2K [3], and Test4K [3]) for the  $\times 2$  and  $\times 4$  SR tasks. This validates the advantages of our training strategy over the two variant strategies of “E2E” and “w/o S”, for our MGA scheme.

**More details on our Ablation Study 4) in the main paper.** In Table 10, we summarize the quantitative results of two SR networks (FSRCNN [2] and PAN [12]) on five datasets (i.e., B100 [7], Urban100 [4], Manga109 [8], Test2K [3], and Test4K [3]) for the  $\times 2$  and  $\times 4$  SR tasks. The results show that  $p = 4$  is better than the other choices to trade-off the performance of our MGA scheme between the PSNR/SSIM results and amounts of FLOPs.

**How does the value of  $K$  influence our MGA on the SR performance?** The  $K$  is an important factor to affect the FLOPs and SR capability of the mask-guided SR networks. Here, we compare the RFDN-M with different  $K$ s and list the results in Table 5. One can see that the RFDN-M with larger  $K$  enjoys better PSNR and SSIM results, but suffers from higher FLOPs and Activations. By varying the value of  $K$ , our MGA scheme can provide a flexible trade-off between the SR capability and network efficiency for the RFDN.

Table 5: **Results of RFDN-M with different numbers ( $K$ ) of elements selected from the error mask** on the Urban100 dataset. The image size is  $376 \times 512 \times 3$ . “All”: selecting all errors for each image. The scale factor is 2.

| Method         | RFDN-B   | RFDN-M(0) | RFDN-M(1000) | RFDN-M(2000) | RFDN-M(4000) | RFDN-M(6000) | RFDN-M(8000) | RFDN-M(All) |
|----------------|----------|-----------|--------------|--------------|--------------|--------------|--------------|-------------|
| FLOPs(G)       | 76.4988  | 80.8363   | 89.5428      | 98.2492      | 115.6621     | 133.0749     | 150.4878     | 181.2546    |
| Activations(M) | 322.2028 | 331.8405  | 365.5445     | 399.2485     | 466.6565     | 534.0645     | 601.4725     | 727.7294    |
| PSNR           | 32.00    | 31.99     | 32.26        | 32.30        | 32.34        | 32.36        | 32.36        | 32.36       |
| SSIM           | 0.9268   | 0.9265    | 0.9296       | 0.9299       | 0.9302       | 0.9304       | 0.9305       | 0.9306      |

## 10 More Visual Comparisons

In Figures 1–14, we visualize the SR results of all five representative SR networks and the corresponding accelerated variants by our MGA scheme on seven test datasets for  $\times 3$ , and  $\times 4$  SR tasks.

Table 6: Comparison of parameters (Params), PSNR (dB), SSIM [9], and FLOPs (G) results by different SR networks on the Urban100, Test2K and Test4K datasets. “-B”: Base-Net. “-D”: D-Net. “-A”: ALL-Net. “-M”: network accelerated by our MGA scheme.

| Scale      | Method            | Params | Urban100 |        |         | Test2K |        |         | Test4K |        |          |
|------------|-------------------|--------|----------|--------|---------|--------|--------|---------|--------|--------|----------|
|            |                   |        | PSNR     | SSIM   | FLOPs   | PSNR   | SSIM   | FLOPs   | PSNR   | SSIM   | FLOPs    |
| $\times 2$ | FSRCNN-B          | 23K    | 29.15    | 0.8913 | 12.38   | 31.52  | 0.9107 | 28.65   | 33.32  | 0.9326 | 109.92   |
|            | FSRCNN-D          | 42K    | 29.38    | 0.8951 | 23.80   | 31.62  | 0.9122 | 55.08   | 33.43  | 0.9337 | 211.33   |
|            | FSRCNN-A          | 42K    | 29.59    | 0.8980 | 24.43   | 31.68  | 0.9129 | 56.55   | 33.50  | 0.9343 | 216.95   |
|            | <b>FSRCNN-M</b>   | 43K    | 29.56    | 0.8973 | 13.63   | 31.67  | 0.9128 | 30.23   | 33.49  | 0.9343 | 113.15   |
|            | PAN-B             | 204K   | 31.58    | 0.9234 | 48.26   | 32.37  | 0.9232 | 111.70  | 34.37  | 0.9428 | 428.56   |
|            | PAN-D             | 291K   | 31.86    | 0.9259 | 73.91   | 32.46  | 0.9242 | 171.09  | 34.48  | 0.9436 | 656.39   |
|            | PAN-A             | 291K   | 31.95    | 0.9267 | 97.67   | 32.49  | 0.9247 | 226.09  | 34.52  | 0.9440 | 867.40   |
|            | <b>PAN-M</b>      | 306K   | 31.81    | 0.9252 | 55.14   | 32.45  | 0.9240 | 122.25  | 34.45  | 0.9433 | 457.42   |
|            | RFDN-B            | 417K   | 32.00    | 0.9268 | 76.82   | 32.49  | 0.9247 | 177.82  | 34.53  | 0.9441 | 682.26   |
|            | RFDN-D            | 684K   | 32.16    | 0.9285 | 126.85  | 32.58  | 0.9255 | 293.62  | 34.61  | 0.9446 | 1126.54  |
|            | RFDN-A            | 684K   | 32.36    | 0.9306 | 182.02  | 32.62  | 0.9262 | 421.33  | 34.66  | 0.9451 | 1616.47  |
|            | <b>RFDN-M</b>     | 740K   | 32.26    | 0.9296 | 89.88   | 32.57  | 0.9254 | 196.61  | 34.59  | 0.9445 | 729.65   |
|            | SRResNet-B        | 1.10M  | 30.45    | 0.9162 | 221.92  | 30.84  | 0.9115 | 513.67  | 30.91  | 0.9199 | 1970.75  |
|            | SRResNet-D        | 1.67M  | 30.80    | 0.9186 | 340.95  | 31.23  | 0.9139 | 789.21  | 31.43  | 0.9238 | 3027.88  |
|            | SRResNet-A        | 1.67M  | 31.12    | 0.9222 | 430.12  | 31.37  | 0.9168 | 995.59  | 31.81  | 0.9275 | 3819.68  |
|            | <b>SRResNet-M</b> | 1.71M  | 30.87    | 0.9199 | 246.28  | 31.13  | 0.9140 | 547.42  | 31.27  | 0.9214 | 2051.34  |
|            | RCAN-B            | 10.87M | 32.58    | 0.9326 | 2084.39 | 32.70  | 0.9273 | 4824.77 | 34.72  | 0.9458 | 18510.62 |
|            | RCAN-D            | 15.70M | 33.30    | 0.9385 | 3012.95 | 32.96  | 0.9302 | 6974.12 | 34.98  | 0.9476 | 26756.77 |
|            | RCAN-A            | 15.70M | 33.29    | 0.9381 | 4127.81 | 32.95  | 0.9301 | 9554.71 | 34.97  | 0.9476 | 36657.38 |
|            | <b>RCAN-M</b>     | 15.74M | 33.26    | 0.9379 | 2260.64 | 32.94  | 0.9300 | 5010.41 | 34.96  | 0.9475 | 18743.10 |

Table 7: Comparison results of parameter number (Params), PSNR (dB), SSIM [9], and FLOPs (G) by different SR networks on the Set5, Set14, B100 and Manga109 datasets. “-B”: Base-Net. “-D”: D-Net. “-A”: ALL-Net. “-M”: network accelerated by our MGA scheme.

| Scale | Method            | Params | Set5  |        |        | Set14 |        |         | B100  |        |        | Manga109 |        |         |
|-------|-------------------|--------|-------|--------|--------|-------|--------|---------|-------|--------|--------|----------|--------|---------|
|       |                   |        | PSNR  | SSIM   | FLOPs  | PSNR  | SSIM   | FLOPs   | PSNR  | SSIM   | FLOPs  | PSNR     | SSIM   | FLOPs   |
| ×2    | FSRCNN-B          | 23K    | 36.59 | 0.9546 | 1.81   | 32.36 | 0.9068 | 3.67    | 31.25 | 0.8872 | 2.46   | 35.51    | 0.9670 | 15.38   |
|       | FSRCNN-D          | 42K    | 36.82 | 0.9556 | 3.48   | 32.52 | 0.9080 | 7.06    | 31.35 | 0.8886 | 4.73   | 36.03    | 0.9690 | 29.57   |
|       | FSRCNN-A          | 42K    | 36.97 | 0.9560 | 3.58   | 32.61 | 0.9088 | 7.24    | 31.42 | 0.8894 | 4.85   | 36.27    | 0.9701 | 30.35   |
|       | <b>FSRCNN-M</b>   | 43K    | 36.97 | 0.9561 | 2.09   | 32.60 | 0.9087 | 3.98    | 31.42 | 0.8895 | 2.75   | 36.22    | 0.9697 | 16.69   |
|       | PAN-B             | 204K   | 37.87 | 0.9601 | 7.07   | 33.41 | 0.9168 | 14.31   | 32.08 | 0.8987 | 9.59   | 38.28    | 0.9766 | 59.96   |
|       | PAN-D             | 291K   | 37.93 | 0.9603 | 10.82  | 33.51 | 0.9174 | 21.91   | 32.15 | 0.8992 | 14.68  | 38.57    | 0.9771 | 91.84   |
|       | PAN-A             | 291K   | 37.98 | 0.9605 | 14.30  | 33.56 | 0.9178 | 28.96   | 32.17 | 0.8996 | 19.40  | 38.64    | 0.9773 | 121.36  |
|       | <b>PAN-M</b>      | 306K   | 37.95 | 0.9603 | 8.46   | 33.52 | 0.9173 | 16.12   | 32.15 | 0.8991 | 11.12  | 38.50    | 0.9769 | 67.52   |
|       | RFDN-B            | 417K   | 37.95 | 0.9603 | 11.25  | 33.57 | 0.9183 | 22.78   | 32.16 | 0.8995 | 15.26  | 38.75    | 0.9773 | 95.45   |
|       | RFDN-D            | 684K   | 38.02 | 0.9606 | 18.57  | 33.64 | 0.9185 | 37.61   | 32.19 | 0.8998 | 25.19  | 38.95    | 0.9777 | 157.61  |
|       | RFDN-A            | 684K   | 38.06 | 0.9607 | 26.65  | 33.72 | 0.9191 | 53.96   | 32.24 | 0.9005 | 36.15  | 39.09    | 0.9781 | 266.16  |
|       | <b>RFDN-M</b>     | 740K   | 38.03 | 0.9606 | 13.97  | 33.67 | 0.9186 | 26.16   | 32.23 | 0.9003 | 18.21  | 38.92    | 0.9776 | 109.57  |
|       | SRResNet-B        | 1.10M  | 37.61 | 0.9595 | 32.49  | 33.05 | 0.9155 | 65.80   | 31.87 | 0.8979 | 44.08  | 35.89    | 0.9708 | 275.74  |
|       | SRResNet-D        | 1.67M  | 37.75 | 0.9599 | 49.92  | 33.19 | 0.9161 | 101.09  | 32.01 | 0.8981 | 67.72  | 36.31    | 0.9723 | 423.65  |
|       | SRResNet-A        | 1.67M  | 37.85 | 0.9601 | 62.97  | 33.36 | 0.9168 | 127.52  | 32.02 | 0.8985 | 85.43  | 37.30    | 0.9747 | 534.43  |
|       | <b>SRResNet-M</b> | 1.71M  | 37.80 | 0.9600 | 37.67  | 33.27 | 0.9165 | 72.05   | 31.99 | 0.8985 | 49.63  | 36.98    | 0.9739 | 301.83  |
|       | RCAN-B            | 10.87M | 38.11 | 0.9610 | 305.17 | 33.79 | 0.9198 | 617.99  | 32.27 | 0.9011 | 414.02 | 39.07    | 0.9782 | 2589.92 |
|       | RCAN-D            | 15.70M | 38.30 | 0.9617 | 441.12 | 34.19 | 0.9224 | 893.30  | 32.41 | 0.9026 | 598.47 | 39.68    | 0.9794 | 3743.68 |
|       | RCAN-A            | 15.70M | 38.31 | 0.9618 | 604.34 | 34.17 | 0.9222 | 1223.84 | 32.40 | 0.9026 | 819.91 | 39.68    | 0.9795 | 5128.93 |
|       | <b>RCAN-M</b>     | 15.74M | 38.31 | 0.9618 | 346.80 | 34.15 | 0.9221 | 660.70  | 32.40 | 0.9026 | 456.03 | 39.62    | 0.9793 | 2767.90 |
| ×3    | FSRCNN-B          | 23K    | 32.53 | 0.9077 | 1.62   | 29.16 | 0.8204 | 3.31    | 28.25 | 0.7848 | 2.20   | 29.84    | 0.9070 | 13.91   |
|       | FSRCNN-D          | 42K    | 32.75 | 0.9111 | 3.19   | 29.31 | 0.8232 | 6.49    | 28.36 | 0.7877 | 4.31   | 30.39    | 0.9147 | 27.31   |
|       | FSRCNN-A          | 42K    | 32.89 | 0.9129 | 3.23   | 29.41 | 0.8247 | 6.58    | 28.43 | 0.7889 | 4.37   | 30.71    | 0.9180 | 27.65   |
|       | <b>FSRCNN-M</b>   | 43K    | 32.89 | 0.9129 | 2.14   | 29.40 | 0.8244 | 3.84    | 28.43 | 0.7886 | 2.72   | 30.68    | 0.9173 | 16.14   |
|       | PAN-B             | 204K   | 34.21 | 0.9262 | 4.00   | 30.18 | 0.8400 | 8.15    | 29.01 | 0.8045 | 5.41   | 33.13    | 0.9421 | 34.25   |
|       | PAN-D             | 291K   | 34.29 | 0.9266 | 7.13   | 30.28 | 0.8408 | 14.54   | 29.06 | 0.8048 | 9.65   | 33.39    | 0.9434 | 61.13   |
|       | PAN-A             | 291K   | 34.32 | 0.9271 | 9.70   | 30.33 | 0.8424 | 19.76   | 29.09 | 0.8060 | 13.12  | 33.47    | 0.9442 | 83.09   |
|       | <b>PAN-M</b>      | 306K   | 34.30 | 0.9267 | 5.95   | 30.30 | 0.8416 | 10.29   | 29.07 | 0.8053 | 7.43   | 33.36    | 0.9429 | 43.19   |
|       | RFDN-B            | 417K   | 34.25 | 0.9263 | 4.97   | 30.26 | 0.8408 | 10.13   | 29.05 | 0.8048 | 6.72   | 33.36    | 0.9428 | 42.58   |
|       | RFDN-D            | 684K   | 34.37 | 0.9273 | 8.23   | 30.27 | 0.8411 | 16.78   | 29.09 | 0.8057 | 11.14  | 33.57    | 0.9443 | 70.55   |
|       | RFDN-A            | 684K   | 34.41 | 0.9278 | 11.74  | 30.37 | 0.8428 | 23.93   | 29.13 | 0.8070 | 15.89  | 33.80    | 0.9456 | 100.62  |
|       | <b>RFDN-M</b>     | 740K   | 34.41 | 0.9276 | 7.36   | 30.34 | 0.8422 | 12.81   | 29.12 | 0.8066 | 9.21   | 33.69    | 0.9445 | 53.77   |
|       | SRResNet-B        | 1.10M  | 34.17 | 0.9260 | 17.34  | 30.07 | 0.8390 | 35.34   | 28.98 | 0.8048 | 23.47  | 32.74    | 0.9395 | 148.60  |
|       | SRResNet-D        | 1.67M  | 34.39 | 0.9275 | 28.14  | 30.28 | 0.8416 | 57.35   | 29.10 | 0.8064 | 38.08  | 33.38    | 0.9433 | 241.12  |
|       | SRResNet-A        | 1.67M  | 34.38 | 0.9274 | 33.81  | 30.30 | 0.8416 | 68.90   | 29.10 | 0.8065 | 45.75  | 33.44    | 0.9435 | 289.72  |
|       | <b>SRResNet-M</b> | 1.71M  | 34.37 | 0.9272 | 22.94  | 30.28 | 0.8411 | 41.41   | 29.10 | 0.8060 | 29.22  | 33.36    | 0.9425 | 173.91  |
|       | RCAN-B            | 10.87M | 34.53 | 0.9289 | 134.93 | 30.46 | 0.8450 | 275.02  | 29.20 | 0.8094 | 182.62 | 34.03    | 0.9474 | 1156.36 |
|       | RCAN-D            | 15.70M | 34.80 | 0.9303 | 196.35 | 30.66 | 0.8485 | 400.22  | 29.33 | 0.8122 | 265.76 | 34.70    | 0.9508 | 1682.77 |
|       | RCAN-A            | 15.70M | 34.78 | 0.9305 | 267.25 | 30.68 | 0.8485 | 544.74  | 29.33 | 0.8124 | 361.72 | 34.73    | 0.9510 | 2290.39 |
|       | <b>RCAN-M</b>     | 15.74M | 34.78 | 0.9304 | 176.71 | 30.66 | 0.8490 | 317.28  | 29.33 | 0.8123 | 224.57 | 34.67    | 0.9504 | 1332.46 |
| ×4    | FSRCNN-B          | 23K    | 30.25 | 0.8625 | 1.59   | 27.39 | 0.7536 | 3.25    | 26.85 | 0.7115 | 2.18   | 27.19    | 0.8519 | 13.52   |
|       | FSRCNN-D          | 42K    | 30.47 | 0.8660 | 3.15   | 27.54 | 0.7559 | 6.42    | 26.91 | 0.7128 | 4.32   | 27.41    | 0.8552 | 26.74   |
|       | FSRCNN-A          | 42K    | 30.58 | 0.8684 | 3.17   | 27.62 | 0.7578 | 6.47    | 26.95 | 0.7141 | 4.35   | 27.65    | 0.8605 | 26.94   |
|       | <b>FSRCNN-M</b>   | 43K    | 30.58 | 0.8684 | 2.47   | 27.61 | 0.7575 | 4.13    | 26.94 | 0.7140 | 3.06   | 27.64    | 0.8598 | 17.21   |
|       | PAN-B             | 204K   | 31.92 | 0.8936 | 3.03   | 28.50 | 0.7802 | 6.19    | 27.51 | 0.7339 | 4.16   | 30.18    | 0.9052 | 25.77   |
|       | PAN-D             | 291K   | 32.06 | 0.8949 | 5.25   | 28.54 | 0.7807 | 10.70   | 27.56 | 0.7349 | 7.20   | 30.33    | 0.9071 | 44.58   |
|       | PAN-A             | 291K   | 32.09 | 0.8952 | 6.63   | 28.57 | 0.7815 | 13.52   | 27.57 | 0.7356 | 9.09   | 30.41    | 0.9080 | 56.31   |
|       | <b>PAN-M</b>      | 306K   | 32.09 | 0.8951 | 5.10   | 28.56 | 0.7810 | 8.36    | 27.57 | 0.7353 | 6.27   | 30.37    | 0.9070 | 34.84   |
|       | RFDN-B            | 417K   | 32.08 | 0.8939 | 2.89   | 28.57 | 0.7817 | 5.90    | 27.54 | 0.7340 | 3.97   | 30.38    | 0.9073 | 24.60   |
|       | RFDN-D            | 684K   | 32.15 | 0.8956 | 4.82   | 28.62 | 0.7824 | 9.83    | 27.59 | 0.7364 | 6.61   | 30.57    | 0.9093 | 40.95   |
|       | RFDN-A            | 684K   | 32.21 | 0.8963 | 6.81   | 28.65 | 0.7827 | 13.90   | 27.61 | 0.7367 | 9.35   | 30.69    | 0.9104 | 57.92   |
|       | <b>RFDN-M</b>     | 740K   | 32.20 | 0.8962 | 4.13   | 28.64 | 0.7823 | 8.38    | 27.61 | 0.7364 | 6.34   | 30.63    | 0.9089 | 34.90   |
|       | SRResNet-B        | 1.10M  | 31.96 | 0.8933 | 13.47  | 28.43 | 0.7792 | 27.49   | 27.50 | 0.7339 | 18.48  | 29.84    | 0.9025 | 114.51  |
|       | SRResNet-D        | 1.67M  | 32.20 | 0.8960 | 23.22  | 28.59 | 0.7822 | 47.38   | 27.58 | 0.7364 | 31.86  | 30.33    | 0.9073 | 197.37  |
|       | SRResNet-A        | 1.67M  | 32.17 | 0.8955 | 26.45  | 28.60 | 0.7822 | 53.96   | 27.59 | 0.7367 | 36.29  | 30.31    | 0.9068 | 224.80  |
|       | <b>SRResNet-M</b> | 1.71M  | 32.17 | 0.8955 | 20.85  | 28.59 | 0.7821 | 35.14   | 27.59 | 0.7366 | 25.96  | 30.30    | 0.9064 | 146.38  |
|       | RCAN-B            | 10.87M | 32.37 | 0.8980 | 79.73  | 28.78 | 0.7862 | 162.65  | 27.70 | 0.7400 | 109.37 | 31.07    | 0.9148 | 677.55  |
|       | RCAN-D            | 15.70M | 32.59 | 0.9003 | 117.62 | 28.93 | 0.7902 | 239.93  | 27.81 | 0.7440 | 161.34 | 31.50    | 0.9181 | 999.53  |
|       | RCAN-A            | 15.70M | 32.58 | 0.9007 | 157.97 | 28.94 | 0.7906 | 322.26  | 27.82 | 0.7444 | 216.70 | 31.60    | 0.9197 | 1342.50 |
|       | <b>RCAN-M</b>     | 15.74M | 32.57 | 0.9007 | 106.82 | 28.93 | 0.7903 | 206.11  | 27.82 | 0.7444 | 152.66 | 31.56    | 0.9189 | 858.64  |

Table 8: **Comparison results of PSNR (dB), SSIM [9], and FLOPs (G) by the FSRCNN-M and PAN-M with the spatial feature map  $F_s$  of one channel or two channels in our MP module on B100, Urban100, Manga109, Test2K, and Test4K. “-B”: Base-Net. “-D”: D-Net. “-M”: network accelerated by our MGA scheme. “1C”: the spatial feature  $F_s$  is of one channel.**

| Scale      | Method       | B100  |        |       | Urban100 |        |       | Manga109 |        |       | Test2K |        |        | Test4K |        |        |
|------------|--------------|-------|--------|-------|----------|--------|-------|----------|--------|-------|--------|--------|--------|--------|--------|--------|
|            |              | PSNR  | SSIM   | FLOPs | PSNR     | SSIM   | FLOPs | PSNR     | SSIM   | FLOPs | PSNR   | SSIM   | FLOPs  | PSNR   | SSIM   | FLOPs  |
| $\times 2$ | FSRCNN-B     | 31.25 | 0.8872 | 2.46  | 29.15    | 0.8913 | 12.38 | 35.51    | 0.9670 | 15.38 | 31.52  | 0.9107 | 28.65  | 33.32  | 0.9326 | 109.92 |
|            | FSRCNN-M(1C) | 31.41 | 0.8894 | 2.75  | 29.54    | 0.8972 | 13.63 | 36.18    | 0.9696 | 16.69 | 31.66  | 0.9128 | 30.23  | 33.49  | 0.9342 | 113.15 |
|            | FSRCNN-M     | 31.42 | 0.8895 | 2.75  | 29.56    | 0.8973 | 13.63 | 36.22    | 0.9697 | 16.69 | 31.67  | 0.9128 | 30.23  | 33.49  | 0.9343 | 113.15 |
|            | FSRCNN-D     | 31.35 | 0.8886 | 4.73  | 29.38    | 0.8951 | 23.80 | 36.03    | 0.9690 | 29.57 | 31.62  | 0.9122 | 55.08  | 33.43  | 0.9337 | 211.33 |
|            | PAN-B        | 32.08 | 0.8987 | 9.59  | 31.58    | 0.9234 | 48.26 | 38.28    | 0.9766 | 59.96 | 32.37  | 0.9232 | 111.70 | 34.37  | 0.9428 | 428.56 |
|            | PAN-M(1C)    | 32.12 | 0.8990 | 11.12 | 31.75    | 0.9250 | 55.14 | 38.39    | 0.9768 | 67.52 | 32.44  | 0.9240 | 122.25 | 34.44  | 0.9433 | 457.42 |
|            | PAN-M        | 32.15 | 0.8991 | 11.12 | 31.81    | 0.9252 | 55.14 | 38.50    | 0.9769 | 67.52 | 32.45  | 0.9240 | 122.25 | 34.45  | 0.9433 | 457.42 |
|            | PAN-D        | 32.15 | 0.8992 | 14.68 | 31.86    | 0.9259 | 73.91 | 38.57    | 0.9771 | 91.84 | 32.46  | 0.9242 | 171.09 | 34.48  | 0.9436 | 656.39 |
| $\times 4$ | FSRCNN-B     | 26.85 | 0.7115 | 2.18  | 24.32    | 0.7192 | 10.93 | 27.19    | 0.8519 | 13.52 | 27.01  | 0.7499 | 25.43  | 28.22  | 0.7984 | 97.57  |
|            | FSRCNN-M(1C) | 26.92 | 0.7136 | 3.06  | 24.46    | 0.7251 | 14.60 | 27.57    | 0.8591 | 17.21 | 27.07  | 0.7520 | 29.19  | 28.30  | 0.8003 | 101.74 |
|            | FSRCNN-M     | 26.94 | 0.7140 | 3.06  | 24.50    | 0.7261 | 14.60 | 27.64    | 0.8598 | 17.21 | 27.09  | 0.7523 | 29.19  | 28.31  | 0.8004 | 101.74 |
|            | FSRCNN-D     | 26.91 | 0.7128 | 4.32  | 24.43    | 0.7230 | 21.63 | 27.41    | 0.8552 | 26.74 | 27.06  | 0.7512 | 50.31  | 28.29  | 0.7997 | 193.01 |
|            | PAN-B        | 27.51 | 0.7339 | 4.16  | 25.87    | 0.7780 | 20.84 | 30.18    | 0.9052 | 25.77 | 27.52  | 0.7716 | 48.47  | 28.91  | 0.8187 | 185.96 |
|            | PAN-M(1C)    | 27.54 | 0.7344 | 6.27  | 25.96    | 0.7812 | 29.74 | 30.22    | 0.9060 | 34.84 | 27.55  | 0.7725 | 58.30  | 28.94  | 0.8193 | 200.37 |
|            | PAN-M        | 27.57 | 0.7353 | 6.27  | 26.02    | 0.7825 | 29.74 | 30.37    | 0.9070 | 34.84 | 27.57  | 0.7728 | 58.30  | 28.96  | 0.8195 | 200.37 |
|            | PAN-D        | 27.56 | 0.7349 | 7.20  | 26.01    | 0.7828 | 36.05 | 30.33    | 0.9071 | 44.58 | 27.56  | 0.7725 | 83.86  | 28.96  | 0.8195 | 321.74 |

Table 9: Comparison of PSNR (dB), SSIM [9], and FLOPs (G) results by the FSRCNN-M and PAN-M with different training strategies for our Mask Prediction (MP) module on the B100, Urban100, Manga109, Test2K, and Test4K datasets. “E2E”: end-to-end train the mask-guided network with our MP module from scratch. “w/o S”: train our MP module separately in **Step 3** without supervision.

| Scale      | Method          | B100  |        |       | Urban100 |        |       | Manga109 |        |       | Test2K |        |        | Test4K |        |        |
|------------|-----------------|-------|--------|-------|----------|--------|-------|----------|--------|-------|--------|--------|--------|--------|--------|--------|
|            |                 | PSNR  | SSIM   | FLOPs | PSNR     | SSIM   | FLOPs | PSNR     | SSIM   | FLOPs | PSNR   | SSIM   | FLOPs  | PSNR   | SSIM   | FLOPs  |
| $\times 2$ | FSRCNN-B        | 31.25 | 0.8872 | 2.46  | 29.15    | 0.8913 | 12.38 | 35.51    | 0.9670 | 15.38 | 31.52  | 0.9107 | 28.65  | 33.32  | 0.9326 | 109.92 |
|            | FSRCNN-M(E2E)   | 31.22 | 0.8874 | 2.75  | 29.10    | 0.8910 | 13.63 | 35.40    | 0.9667 | 16.69 | 31.50  | 0.9110 | 30.23  | 33.27  | 0.9326 | 113.15 |
|            | FSRCNN-M(w/o S) | 31.38 | 0.8890 | 2.75  | 29.50    | 0.8970 | 13.63 | 36.13    | 0.9693 | 16.69 | 31.64  | 0.9124 | 30.23  | 33.47  | 0.9341 | 113.15 |
|            | FSRCNN-M        | 31.42 | 0.8895 | 2.75  | 29.56    | 0.8973 | 13.63 | 36.22    | 0.9697 | 16.69 | 31.67  | 0.9128 | 30.23  | 33.49  | 0.9343 | 113.15 |
|            | FSRCNN-D        | 31.35 | 0.8886 | 4.73  | 29.38    | 0.8951 | 23.80 | 36.03    | 0.9690 | 29.57 | 31.62  | 0.9122 | 55.08  | 33.43  | 0.9337 | 211.33 |
|            | PAN-B           | 32.08 | 0.8987 | 9.59  | 31.58    | 0.9234 | 48.26 | 38.28    | 0.9766 | 59.96 | 32.37  | 0.9232 | 111.70 | 34.37  | 0.9428 | 428.56 |
|            | PAN-M(E2E)      | 32.02 | 0.8979 | 11.12 | 31.40    | 0.9212 | 55.14 | 38.10    | 0.9761 | 67.52 | 32.32  | 0.9224 | 122.25 | 34.29  | 0.9420 | 457.42 |
|            | PAN-M(w/o S)    | 32.11 | 0.8990 | 11.12 | 31.72    | 0.9248 | 55.14 | 38.37    | 0.9767 | 67.52 | 32.43  | 0.9239 | 122.25 | 34.43  | 0.9432 | 457.42 |
|            | PAN-M           | 32.15 | 0.8991 | 11.12 | 31.81    | 0.9252 | 55.14 | 38.50    | 0.9769 | 67.52 | 32.45  | 0.9240 | 122.25 | 34.45  | 0.9433 | 457.42 |
|            | PAN-D           | 32.15 | 0.8992 | 14.68 | 31.86    | 0.9259 | 73.91 | 38.57    | 0.9771 | 91.84 | 32.46  | 0.9242 | 171.09 | 34.48  | 0.9436 | 656.39 |
| $\times 4$ | FSRCNN-B        | 26.85 | 0.7115 | 2.18  | 24.32    | 0.7192 | 10.93 | 27.19    | 0.8519 | 13.52 | 27.01  | 0.7499 | 25.43  | 28.22  | 0.7984 | 97.57  |
|            | FSRCNN-M(E2E)   | 26.81 | 0.7096 | 3.06  | 24.25    | 0.7155 | 14.60 | 26.95    | 0.8446 | 17.21 | 26.99  | 0.7486 | 29.19  | 28.19  | 0.7971 | 101.74 |
|            | FSRCNN-M(w/o S) | 26.90 | 0.7127 | 3.06  | 24.44    | 0.7240 | 14.60 | 27.50    | 0.8574 | 17.21 | 27.06  | 0.7514 | 29.19  | 28.28  | 0.7997 | 101.74 |
|            | FSRCNN-M        | 26.94 | 0.7140 | 3.06  | 24.50    | 0.7261 | 14.60 | 27.64    | 0.8598 | 17.21 | 27.09  | 0.7523 | 29.19  | 28.31  | 0.8004 | 101.74 |
|            | FSRCNN-D        | 26.91 | 0.7128 | 4.32  | 24.43    | 0.7230 | 21.63 | 27.41    | 0.8552 | 26.74 | 27.06  | 0.7512 | 50.31  | 28.29  | 0.7997 | 193.01 |
|            | PAN-B           | 27.51 | 0.7339 | 4.16  | 25.87    | 0.7780 | 20.84 | 30.18    | 0.9052 | 25.77 | 27.52  | 0.7716 | 48.47  | 28.91  | 0.8187 | 185.96 |
|            | PAN-M(E2E)      | 27.47 | 0.7319 | 6.27  | 25.73    | 0.7736 | 29.74 | 29.93    | 0.9019 | 34.84 | 27.49  | 0.7697 | 58.30  | 28.84  | 0.8165 | 200.37 |
|            | PAN-M(w/o S)    | 27.53 | 0.7343 | 6.27  | 25.91    | 0.7798 | 29.74 | 30.17    | 0.9055 | 34.84 | 27.54  | 0.7720 | 58.30  | 28.92  | 0.8189 | 200.37 |
|            | PAN-M           | 27.57 | 0.7353 | 6.27  | 26.02    | 0.7825 | 29.74 | 30.37    | 0.9070 | 34.84 | 27.57  | 0.7728 | 58.30  | 28.96  | 0.8195 | 200.37 |
|            | PAN-D           | 27.56 | 0.7349 | 7.20  | 26.01    | 0.7828 | 36.05 | 30.33    | 0.9071 | 44.58 | 27.56  | 0.7725 | 83.86  | 28.96  | 0.8195 | 321.74 |

Table 10: **Comparison of PSNR (dB), SSIM [9], and FLOPs (G) results by the FSRCNN-M and PAN-M with different sizes of feature patches (selected between mask prediction and Refine-Net) on B100, Urban100, Manga109, Test2K, and Test4K. “2”:  $2 \times 2$ . “4”:  $4 \times 4$ . “8”:  $8 \times 8$ .**

| Scale      | Method      | B100  |        |       | Urban100 |        |       | Manga109 |        |       | Test2K |        |        | Test4K |        |        |
|------------|-------------|-------|--------|-------|----------|--------|-------|----------|--------|-------|--------|--------|--------|--------|--------|--------|
|            |             | PSNR  | SSIM   | FLOPs | PSNR     | SSIM   | FLOPs | PSNR     | SSIM   | FLOPs | PSNR   | SSIM   | FLOPs  | PSNR   | SSIM   | FLOPs  |
| $\times 2$ | FSRCNN-B    | 31.25 | 0.8872 | 2.46  | 29.15    | 0.8913 | 12.38 | 35.51    | 0.9670 | 15.38 | 31.52  | 0.9107 | 28.65  | 33.32  | 0.9326 | 109.92 |
|            | FSRCNN-M(2) | 31.41 | 0.8892 | 2.77  | 29.53    | 0.8969 | 13.70 | 36.18    | 0.9696 | 16.77 | 31.66  | 0.9126 | 30.31  | 33.47  | 0.9341 | 113.27 |
|            | FSRCNN-M(4) | 31.42 | 0.8895 | 2.75  | 29.56    | 0.8973 | 13.63 | 36.22    | 0.9697 | 16.69 | 31.67  | 0.9128 | 30.23  | 33.49  | 0.9343 | 113.15 |
|            | FSRCNN-M(8) | 31.37 | 0.8888 | 2.74  | 29.44    | 0.8957 | 13.53 | 36.01    | 0.9691 | 16.51 | 31.63  | 0.9123 | 30.20  | 33.44  | 0.9338 | 113.11 |
|            | FSRCNN-D    | 31.35 | 0.8886 | 4.73  | 29.38    | 0.8951 | 23.80 | 36.03    | 0.9690 | 29.57 | 31.62  | 0.9122 | 55.08  | 33.43  | 0.9337 | 211.33 |
|            | PAN-B       | 32.08 | 0.8987 | 9.59  | 31.58    | 0.9234 | 48.26 | 38.28    | 0.9766 | 59.96 | 32.37  | 0.9232 | 111.70 | 34.37  | 0.9428 | 428.56 |
|            | PAN-M(2)    | 32.13 | 0.8990 | 11.76 | 31.73    | 0.9244 | 57.81 | 38.45    | 0.9767 | 70.20 | 32.43  | 0.9238 | 124.94 | 34.43  | 0.9432 | 460.21 |
|            | PAN-M(4)    | 32.15 | 0.8991 | 11.12 | 31.81    | 0.9252 | 55.14 | 38.50    | 0.9769 | 67.52 | 32.45  | 0.9240 | 122.25 | 34.45  | 0.9433 | 457.42 |
|            | PAN-M(8)    | 32.09 | 0.8987 | 10.86 | 31.66    | 0.9241 | 53.81 | 38.28    | 0.9765 | 65.83 | 32.41  | 0.9236 | 121.17 | 34.40  | 0.9430 | 456.31 |
|            | PAN-D       | 32.15 | 0.8992 | 14.68 | 31.86    | 0.9259 | 73.91 | 38.57    | 0.9771 | 91.84 | 32.46  | 0.9242 | 171.09 | 34.48  | 0.9436 | 656.39 |
| $\times 4$ | FSRCNN-B    | 26.85 | 0.7115 | 2.18  | 24.32    | 0.7192 | 10.93 | 27.19    | 0.8519 | 13.52 | 27.01  | 0.7499 | 25.43  | 28.22  | 0.7984 | 97.57  |
|            | FSRCNN-M(2) | 26.95 | 0.7144 | 3.09  | 24.50    | 0.7264 | 14.73 | 27.56    | 0.8585 | 17.76 | 27.08  | 0.7527 | 29.26  | 28.30  | 0.8003 | 101.82 |
|            | FSRCNN-M(4) | 26.94 | 0.7140 | 3.06  | 24.50    | 0.7261 | 14.60 | 27.64    | 0.8598 | 17.21 | 27.09  | 0.7523 | 29.19  | 28.31  | 0.8004 | 101.74 |
|            | FSRCNN-M(8) | 26.92 | 0.7131 | 3.04  | 24.48    | 0.7226 | 14.52 | 27.55    | 0.8573 | 16.73 | 27.07  | 0.7517 | 28.64  | 28.29  | 0.7999 | 101.71 |
|            | FSRCNN-D    | 26.91 | 0.7128 | 4.32  | 24.43    | 0.7230 | 21.63 | 27.41    | 0.8552 | 26.74 | 27.06  | 0.7512 | 50.31  | 28.29  | 0.7997 | 193.01 |
|            | PAN-B       | 27.51 | 0.7339 | 4.16  | 25.87    | 0.7780 | 20.84 | 30.18    | 0.9052 | 25.77 | 27.52  | 0.7716 | 48.47  | 28.91  | 0.8187 | 185.96 |
|            | PAN-M(2)    | 27.56 | 0.7348 | 7.25  | 25.98    | 0.7808 | 33.82 | 30.33    | 0.9063 | 38.92 | 27.56  | 0.7722 | 62.38  | 28.94  | 0.8190 | 204.48 |
|            | PAN-M(4)    | 27.57 | 0.7353 | 6.27  | 26.02    | 0.7825 | 29.74 | 30.37    | 0.9070 | 34.84 | 27.57  | 0.7728 | 58.30  | 28.96  | 0.8195 | 200.37 |
|            | PAN-M(8)    | 27.54 | 0.7345 | 5.86  | 25.92    | 0.7800 | 27.95 | 30.13    | 0.9049 | 32.27 | 27.53  | 0.7724 | 55.59  | 28.92  | 0.8188 | 198.67 |
|            | PAN-D       | 27.56 | 0.7349 | 7.20  | 26.01    | 0.7828 | 36.05 | 30.33    | 0.9071 | 44.58 | 27.56  | 0.7725 | 83.86  | 28.96  | 0.8195 | 321.74 |

## References

1. Bevilacqua, M., Roumy, A., Guillemot, C., Alberi-Morel, M.L.: Low-complexity single-image super-resolution based on nonnegative neighbor embedding (2012)
2. Dong, C., Loy, C.C., Tang, X.: Accelerating the super-resolution convolutional neural network. In: *Eur. Conf. Comput. Vis.* pp. 391–407. Springer (2016)
3. Gu, S., Lugmayr, A., Danelljan, M., Fritsche, M., Lamour, J., Timofte, R.: Div8k: Diverse 8k resolution image dataset. In: *Int. Conf. Comput. Vis. Worksh.* pp. 3512–3516. IEEE (2019)
4. Huang, J.B., Singh, A., Ahuja, N.: Single image super-resolution from transformed self-exemplars. In: *IEEE Conf. Comput. Vis. Pattern Recog.* pp. 5197–5206 (2015)
5. Ledig, C., Theis, L., Huszár, F., Caballero, J., Cunningham, A., Acosta, A., Aitken, A., Tejani, A., Totz, J., Wang, Z., et al.: Photo-realistic single image super-resolution using a generative adversarial network. In: *IEEE Conf. Comput. Vis. Pattern Recog.* pp. 4681–4690 (2017)
6. Liu, J., Tang, J., Wu, G.: Residual feature distillation network for lightweight image super-resolution. In: *Eur. Conf. Comput. Vis.* pp. 41–55. Springer (2020)
7. Martin, D., Fowlkes, C., Tal, D., Malik, J.: A database of human segmented natural images and its application to evaluating segmentation algorithms and measuring ecological statistics. In: *Int. Conf. Comput. Vis.* vol. 2, pp. 416–423. IEEE (2001)
8. Matsui, Y., Ito, K., Aramaki, Y., Fujimoto, A., Ogawa, T., Yamasaki, T., Aizawa, K.: Sketch-based manga retrieval using manga109 dataset. *Multimedia Tools and Applications* **76**(20), 21811–21838 (2017)
9. Wang, Z., Bovik, A.C., Sheikh, H.R., Simoncelli, E.P.: Image quality assessment: from error visibility to structural similarity. *IEEE Trans. Image Process.* **13**(4), 600–612 (2004)
10. Zeyde, R., Elad, M., Protter, M.: On single image scale-up using sparse-representations. In: *International Conference on Curves and Surfaces.* pp. 711–730. Springer (2010)
11. Zhang, Y., Li, K., Li, K., Wang, L., Zhong, B., Fu, Y.: Image super-resolution using very deep residual channel attention networks. In: *Eur. Conf. Comput. Vis.* pp. 286–301 (2018)
12. Zhao, H., Kong, X., He, J., Qiao, Y., Dong, C.: Efficient image super-resolution using pixel attention. In: *Eur. Conf. Comput. Vis.* pp. 56–72. Springer (2020)

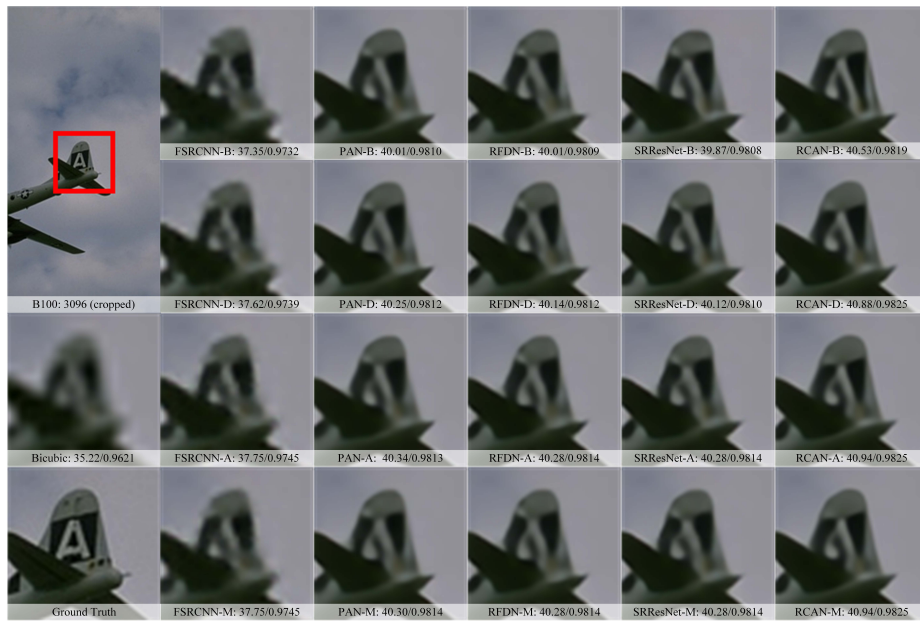

Fig. 1: Comparison of visual quality and PSNR (dB)/SSIM results by different variants of five SR networks (i.e., FSRCNN [2], PAN [12], RFDN [6], SRResNet [5], and RCAN [11]) on B100 [7] at a scale factor of 4.



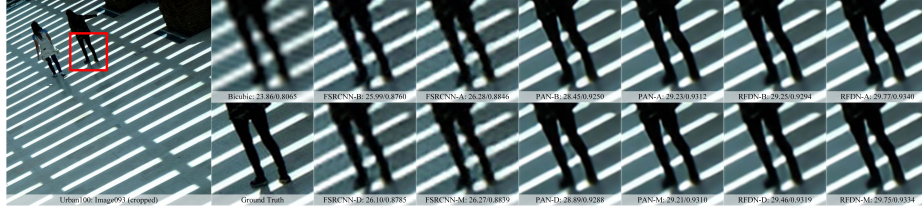

Fig. 2: Comparison of visual quality and PSNR (dB)/SSIM results by different variants of existing SR networks (i.e., FSRCNN [2], PAN [12], and RFDN [6]) on Urban100 [4] at a scale factor of 4.

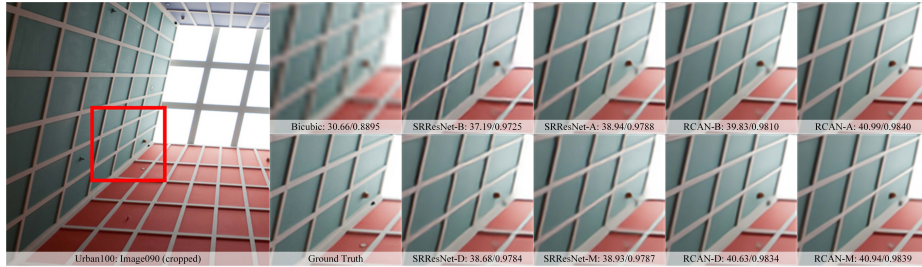

Fig. 3: Comparison of visual quality and PSNR (dB)/SSIM results by different variants of existing SR networks (i.e., SRResNet [5] and RCAN [11]) on Urban100 [4] at a scale factor of 4.

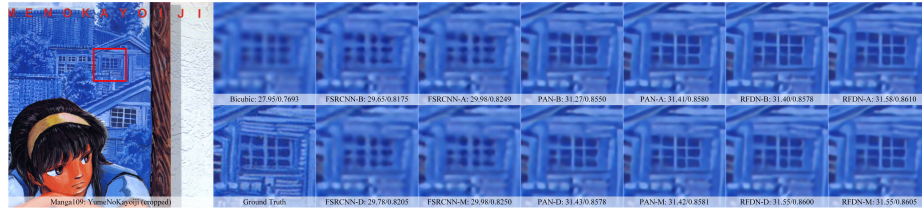

Fig. 4: Comparison of visual quality and PSNR (dB)/SSIM results by different variants of existing SR networks (i.e., FSRCNN [2], PAN [12], and RFDN [6]) on Manga109 [8] at a scale factor of 4.

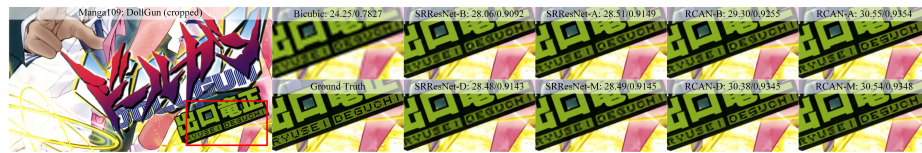

Fig. 5: Comparison of visual quality and PSNR (dB)/SSIM results by different variants of existing SR networks (i.e., SRResNet [5] and RCAN [11]) on Manga109 [8] at a scale factor of 4.

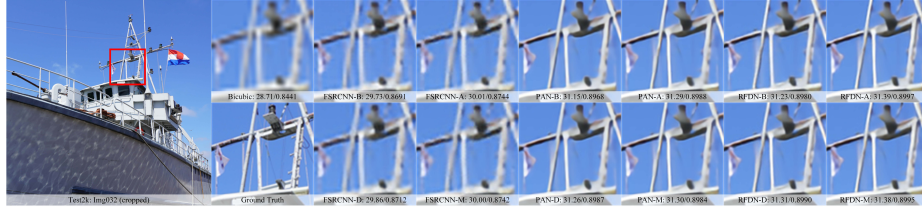

Fig. 6: Comparison of visual quality and PSNR (dB)/SSIM results by different variants of existing SR networks (i.e., FSRCNN [2], PAN [12], and RFDN [6]) on Test2K [3] at a scale factor of 4.

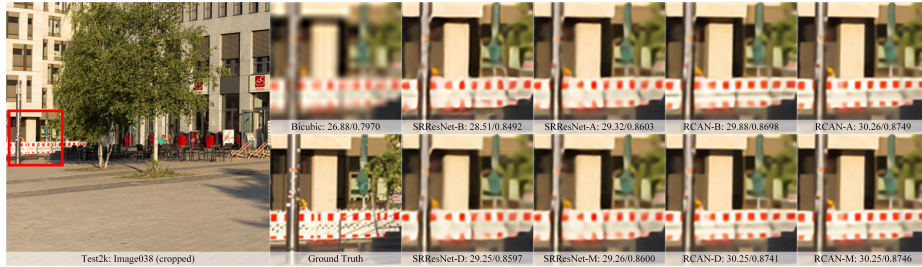

Fig. 7: Comparison of visual quality and PSNR (dB)/SSIM results by different variants of existing SR networks (i.e., SRResNet [5] and RCAN [11]) on Test2K [3] at a scale factor of 4.

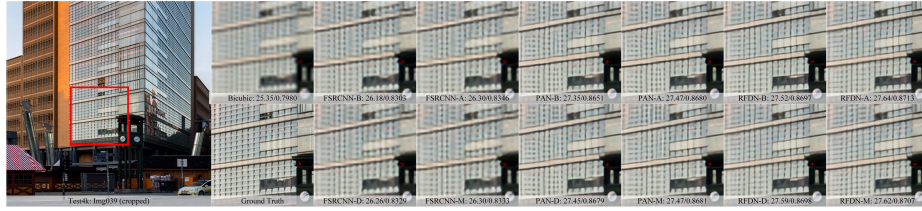

Fig. 8: **Comparison of visual quality and PSNR (dB)/SSIM results by different variants** of existing SR networks (i.e., SRResNet [5] and RCAN [11]) on Test4K [3] at a scale factor of 4.

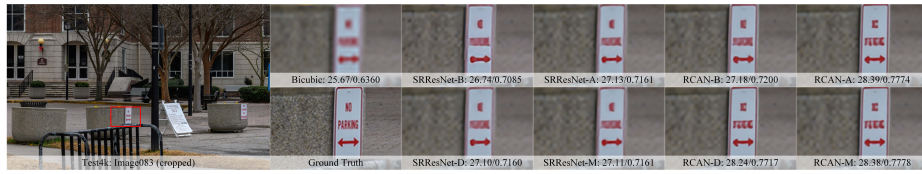

Fig. 9: **Comparison of visual quality and PSNR (dB)/SSIM results by different variants** of existing SR networks (i.e., SRResNet [5] and RCAN [11]) on Test4K [3] at a scale factor of 4.

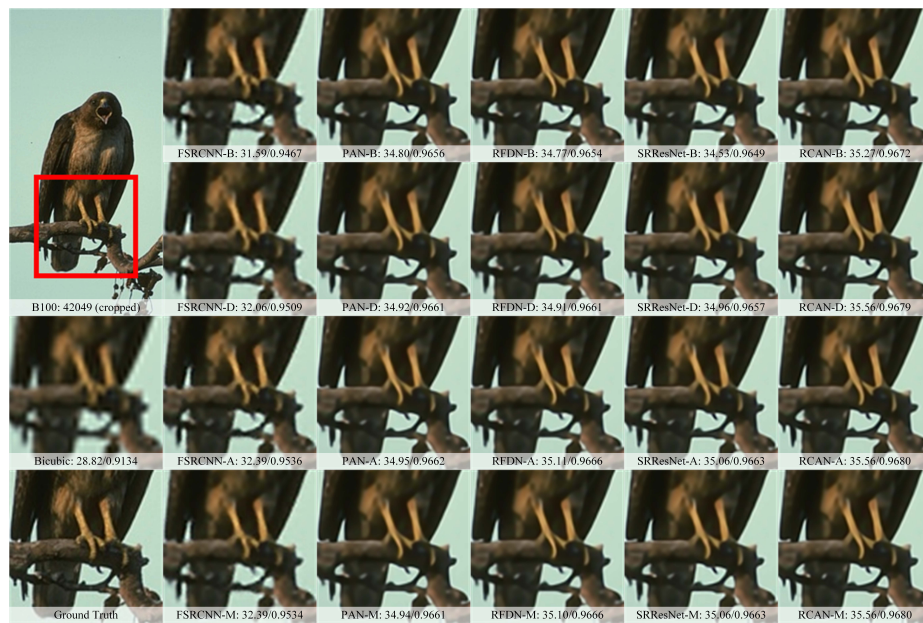

Fig. 10: Comparison of visual quality and PSNR (dB)/SSIM results by different variants of five SR networks (i.e., FSRCNN [2], PAN [12], RFDN [6], SRResNet [5], and RCAN [11]) on B100 [7] at a scale factor of 3.



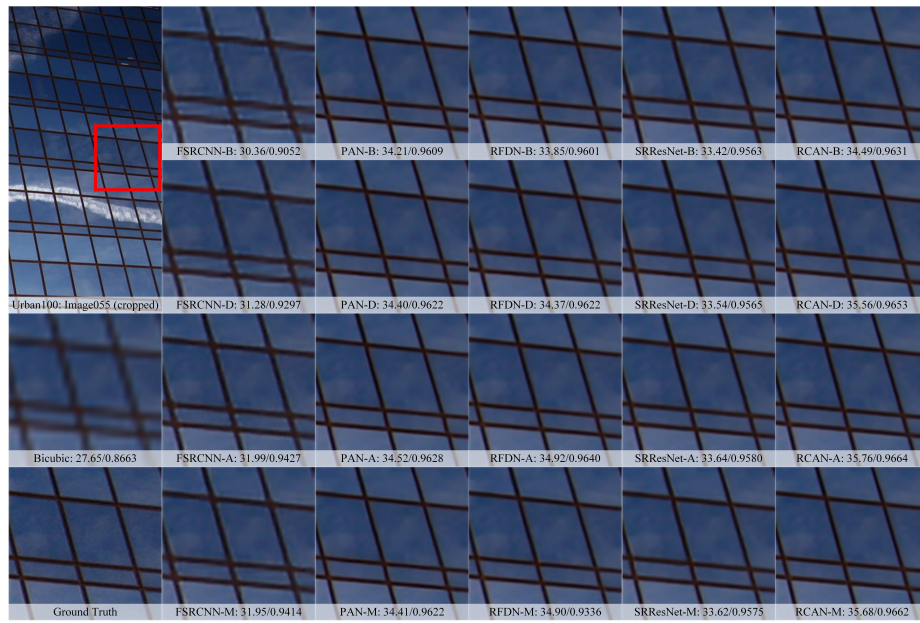

Fig. 11: Comparison of visual quality and PSNR (dB)/SSIM results by different variants of five SR networks (i.e., FSRCNN [2], PAN [12], RFDN [6], SRResNet [5], and RCAN [11]) on Urban100 [4] at a scale factor of 3.

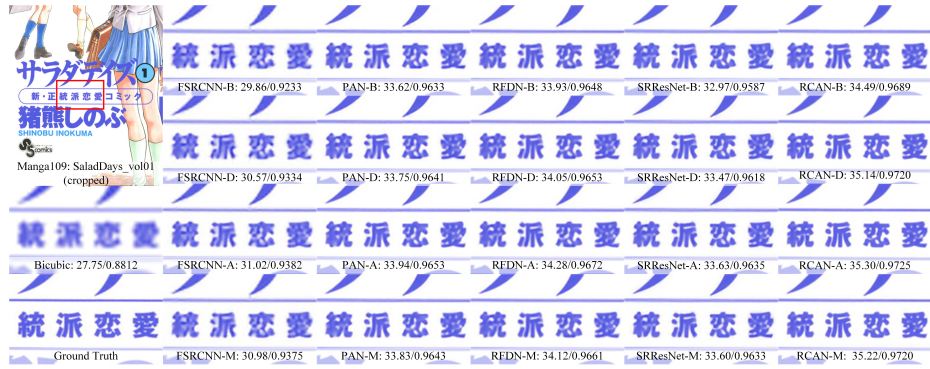

Fig. 12: Comparison of visual quality and PSNR (dB)/SSIM results by different variants of five SR networks (i.e., FSRCNN [2], PAN [12], RFDN [6], SRResNet [5], and RCAN [11]) on Manga109 [8] at a scale factor of 3.

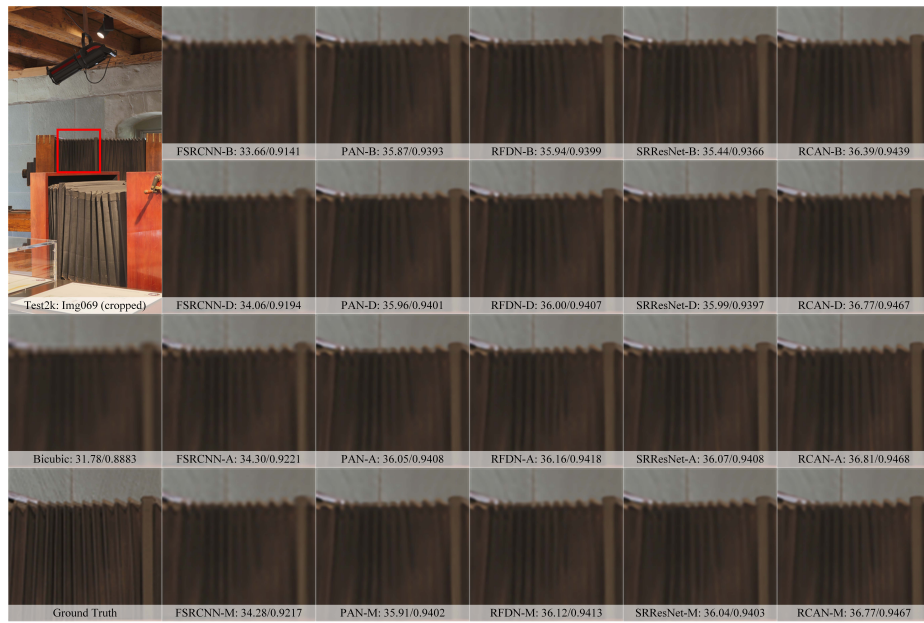

Fig. 13: Comparison of visual quality and PSNR (dB)/SSIM results by different variants of five SR networks (i.e., FSRCNN [2], PAN [12], RFDN [6], SRResNet [5], and RCAN [11]) on Test2K [3] at a scale factor of 3.



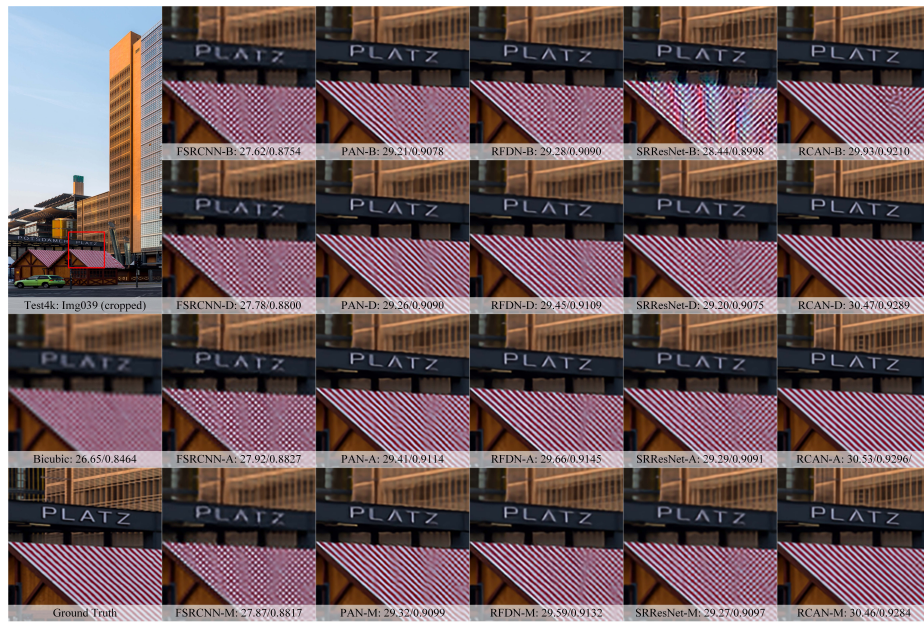

Fig. 14: Comparison of visual quality and PSNR (dB)/SSIM results by different variants of five SR networks (i.e., FSRCNN [2], PAN [12], RFDN [6], SRResNet [5], and RCAN [11]) on Test4K [3] at a scale factor of 3.
